# Supplementary material
Source: PubMed Central journal article supplement (PMC4946433)
Supplement: MCB.00057-16_zmb999101270so1.pdf [file MCB.00057-16_zmb999101270so1.pdf]

**Table S1. Plasmids**

| Name       | Marker/Vector*/Promoter        | Protein                                  | Primers <sup>§</sup> | Construction <sup>†</sup>                                                      |
|------------|--------------------------------|------------------------------------------|----------------------|--------------------------------------------------------------------------------|
| pJR368     | <i>URA3/CEN/SIR4p</i>          | Sir4                                     | -                    | From J. Rine (UC Berkeley)                                                     |
| pPCM14tetO | <i>(URA3,ADE2,LEU2/CEN/NA)</i> | NA                                       | -                    | From P. Megee (UC Denver)                                                      |
| pGAD-C1    | <i>LEU2/2μ/ADH1p</i>           | Gal4 <sub>AD</sub>                       | -                    | (1)                                                                            |
| pBTM116    | <i>TRP1/2μ/ADH1p</i>           | lexA                                     | -                    | “”                                                                             |
| pBTM116H   | <i>HIS3/2μ/ADH1p</i>           | lexA                                     | -                    | (2)                                                                            |
| pCSW22     | <i>HIS3/2μ/ADH1p</i>           | lexA-Sir2 <sup>78-562</sup>              | -                    | “”                                                                             |
| pCSW23     | <i>HIS3/2μ/ADH1p</i>           | lexA-Sir2 <sup>243-562</sup> -H364Y      | -                    | “”                                                                             |
| pCSW55     | <i>TRP1/2μ/ADH1p</i>           | lexA-Sir2 <sup>243-562</sup> -H364Y      | -                    | “”                                                                             |
| pYFC1      | <i>HIS3/2μ/ADH1p</i>           | lexA-Sir2 <sup>499-562</sup>             | -                    | “”                                                                             |
| pYFC6      | <i>HIS3/2μ/ADH1p</i>           | lexA-Hst1 <sup>440-503</sup>             | -                    | “”                                                                             |
| pYFC10     | <i>HIS3/2μ/ADH1p</i>           | lexA-Sir2 <sup>499-562</sup> -AKAA       | 3/4                  | The AKAA mutation was placed in pCSW23 by P-MPGR using pYFC1 as template.      |
| pYFC12     | <i>HIS3/2μ/NA</i>              | Sir2 <sup>364-562</sup> -AKAA            | 5/6, 7/8             | A Sir2 fragment with AKAA mutation was cloned into pRS423 by P-MPGR.           |
| pYFC13     | <i>HIS3/Int/NA</i>             | Sir2 <sup>364-562</sup> -AKAA            |                      | A 2μ fragment was removed from pYFC12 by <i>AfeI</i> digestion and religation. |
| pYFC20     | <i>HIS3/2μ/ADH1p</i>           | lexA-Sir2 <sup>243-562</sup> -H364Y-AKAA | 20/6, 7/21           | The AKAA mutation was placed in pCSW23 by P-MPGR using pCSW23 as template.     |
| pYFC21     | <i>TRP1/2μ/ADH1p</i>           | lexA-Sir2 <sup>243-562</sup> -H364Y-AKAA |                      | Marker swap of pYFC20 by P-MPGR.                                               |
| pYFC29     | <i>HIS3/Int/NA</i>             | Sir2 <sup>364-562</sup> -AKAK            | 9/10                 | The <i>sir2</i> mutation was placed in                                         |

|          |                                     |                                             |       |                                                                                                             |
|----------|-------------------------------------|---------------------------------------------|-------|-------------------------------------------------------------------------------------------------------------|
|          |                                     |                                             |       | <i>Pst</i> I-cut pYFC12 by p-MPGR. A 2 $\mu$ fragment was removed by <i>Afe</i> I digestion and religation. |
| pYFC30   | <i>HIS3/Int/NA</i>                  | Sir2 <sup>364-562</sup> -AKDK               | 11/12 | “”                                                                                                          |
| pYFC31   | <i>HIS3/Int/NA</i>                  | Sir2 <sup>364-562</sup> -EKAK               | 13/14 | “”                                                                                                          |
| pT2-4-14 | <i>LEU2/2<math>\mu</math>/ADH1p</i> | GAL4 <sub>AD</sub> -ESC8 <sup>640-714</sup> | -     | Isolated from library (1).                                                                                  |

° high-copy plamid (2 $\mu$ ), low-copy plasmid (CEN) or integration vector (Int).

§ Primers used for P-MPGR are listed in Table S2.

† P-MPGR (PCR-Mediated Plasmid Gap Repair)

**Table S2. PCR primers**

| #  | Name                        | Sequence (5'-3')                                                                   |
|----|-----------------------------|------------------------------------------------------------------------------------|
| 3  | lexA Cter                   | CTGTTGCCAGAAAATAGCGA                                                               |
| 4  | R primer for AKAA mutant    | GACATACACGCCctgcagcCTTtagcTTGGCATT                                                 |
| 5  | Forward Sir2 at <i>NcoI</i> | gtaatacgactcactatagggcgaattgggtaccgggcATGGCTCTTTTGCTACTGCCAC                       |
| 6  | Reverse Sir2 at AKAA        | ATCTGATGTAACGACATACACGCCctgcagcCTTtagcTTGGCATTTAAAGTTCTTGTCTTC                     |
| 7  | Forward Sir2 before AKAA    | gctgcaGGCGTGTATGTCGTTACATCAGAT                                                     |
| 8  | Reverse Sir2 after orf      | caattaacctcactaaagggaacaaaagctggagctcTTTGAATGTATGGATGCGTTAAATG                     |
| 9  | AKAK-F                      | GAACGATTTGAAGAACAAGAACTTTAAATGCCAAgctAAGgctAAGGGCGTGTATGTCGTTACATCAGATGAACATCCCA   |
| 10 | AKAK-R                      | TGGGATGTTTTCATCTGATGTAACGACATACACGCCCTTtagcCTTtagcTTGGCATTAAAGTTCTTGTCTTCAAATCGTTC |
| 11 | AKDK-F                      | GAACGATTTGAAGAACAAGAACTTTAAATGCCAAgctAAGGATAAAGGGCGTGTATGTCGTTACATCAGATGAACATCCCA  |
| 12 | AKDK-R                      | TGGGATGTTTTCATCTGATGTAACGACATACACGCCCTTATCCTTtagcTTGGCATTAAAGTTCTTGTCTTCAAATCGTTC  |
| 13 | EKAK-F                      | GAACGATTTGAAGAACAAGAACTTTAAATGCCAAGAGAAGgctAAGGGCGTGTATGTCGTTACATCAGATGAACATCCCA   |
| 14 | EKAK-R                      | TGGGATGTTTTCATCTGATGTAACGACATACACGCCCTTtagcCTTCTCTTGGCATTAAAGTTCTTGTCTTCAAATCGTTC  |
| 20 | Sir2-63801                  | Gccaatatggtttacctccag                                                              |
| 21 | ADH1-t-R                    | TAATAAAAATCATAAATC                                                                 |
| 22 | a1-1 (rtPCR)                | cattctaggtactgagattgatgaaa                                                         |
| 23 | a1-2 (rtPCR)                | cgtgctggggtgatattgat                                                               |
| 24 | KCC4-f                      | TTGGTGAAACACTGGGCTTT                                                               |
| 25 | KCC4-r                      | GGCGTATTCCAGGATAAAGGTA                                                             |
| 26 | a2-3'                       | GCGGATGGGTTGGTATTTAA                                                               |
| 27 | a2-5'                       | ACAAATCTAGAAATTACCAGAGCTATC                                                        |
| 28 | 549.7 New S                 | TGAAGATGACATTGCTCCTTT                                                              |
| 29 | 549.7 New AS                | TGGATAATGGATCTGAAACCG                                                              |
| 30 | 534 S                       | ACAAGCATCATTTCATAGCCT                                                              |
| 31 | 534 AS                      | ATCGTGGCTAGGACATTTTG                                                               |

**Table S3. Yeast strains**

| Name    | Genotype                                                                                                                                                                        | Reference |
|---------|---------------------------------------------------------------------------------------------------------------------------------------------------------------------------------|-----------|
| W303-1A | <i>MATa ade2-1 can1-100 his3-11,15 leu2-3,112 trp1-1 ura3-1</i>                                                                                                                 | (3)       |
| YDS631  | W303-1A <i>MATα adh4::URA3::C<sub>1-3</sub>A</i>                                                                                                                                | (4)       |
| L40     | <i>MATa his3-Δ200 trp1-901 leu2-3,112 ade2 lys2-801am URA3::(8xlexA<sup>op</sup>)-lacZ</i><br><i>LYS2::(4xlexA<sup>op</sup>)-HIS3</i>                                           | (5)       |
| MC52    | W303-1A <i>MATα URA3::ADE2-TelVIII SUM1-1</i>                                                                                                                                   | (6)       |
| PMY127  | W303-1A <i>his3-11,15::(GAL1p-RecR::HIS3)<sub>n</sub> LEU2::tetR-GFP::leu2-3,112 bar1</i>                                                                                       | (7)       |
| DMY2800 | W303-1A <i>IGS2::TRP1p-URA3::LEU2</i>                                                                                                                                           | (8)       |
| DMY2804 | W303-1A <i>IGS1::TRP1p-URA3::LEU2</i>                                                                                                                                           | “”        |
| DMY2831 | DMY2800 <i>sir2Δ::kanMX6</i>                                                                                                                                                    | “”        |
| DMY2835 | DMY2804 <i>sir2Δ::kanMX6</i>                                                                                                                                                    | “”        |
| GCY310  | GCY317 <i>esc8Δ::kanMX</i>                                                                                                                                                      | (9)       |
| GCY317  | W303-1A <i>hmrΔA::ADE2::HMRI</i>                                                                                                                                                | “”        |
| GA-2050 | W303-1A <i>MATα hmrΔEB-4lex<sup>op</sup>-TRP1::HMRI</i>                                                                                                                         | (10)      |
| THC74   | W303-1A <i>URA3 HML::URA3p-ADE2</i>                                                                                                                                             | (11)      |
| CSW10   | W303-1A <i>RS::HMRE-a2a1-HMRI-TRP1-256xlac<sup>op</sup>::RS (LEU2::GAL1p-R)<sub>2</sub>::leu2-3,112 ADE2::HIS3p-lacGFP::ade2-1</i>                                              | (12)      |
| CRC83   | CSW10 <i>MATα scc1-73</i>                                                                                                                                                       | “”        |
| CSW42   | W303-1A <i>RS::6xlex<sup>op</sup>ssEB-a2a1-256xlac<sup>op</sup>-TRP1-hmrΔI::RS (LEU2::GAL1p-R)<sub>2</sub>::leu2-3,112 ADE2::HIS3p-lacGFP::ade2-1 bar1Δ::hisG sir2Δ::klURA3</i> | (2)       |
| CSW84   | CSW10 <i>sir2Δ::hphMX</i>                                                                                                                                                       | “”        |
| CSW98   | GA-2050 <i>sir2Δ::hphMX</i>                                                                                                                                                     | “”        |
| CSW116  | W303-1A <i>MATα MCD1-TAP::natMX</i>                                                                                                                                             | “”        |
| CSW157  | GA-2050 <i>sir4Δ::kanMX</i>                                                                                                                                                     | “”        |
| CCC1    | YDS631 <i>sir2Δ::kanMX</i>                                                                                                                                                      | (13)      |

|        |                                                                                                                                                                |            |
|--------|----------------------------------------------------------------------------------------------------------------------------------------------------------------|------------|
| CCC3   | THC74 <i>sir2Δ::kanMX</i>                                                                                                                                      | “”         |
| YFC1   | CSW10 <i>sir2-AKAA::HIS3</i>                                                                                                                                   | This study |
| YFC3   | DMY2800 <i>sir2-AKAA::HIS3</i>                                                                                                                                 | “”         |
| YFC7   | CSW116 <i>sir2-AKAA::HIS3</i>                                                                                                                                  | “”         |
| YFC8   | CSW84 <i>MATa SUM1-1 URA3::ADE2-TelVIII</i>                                                                                                                    | “”         |
| YFC9   | CSW116 <i>sir2Δ::hphMX</i>                                                                                                                                     | “”         |
| YFC12  | YDS631 <i>sir2-AKAA::HIS3</i>                                                                                                                                  | “”         |
| YFC13  | DMY2804 <i>sir2-AKAA::HIS3</i>                                                                                                                                 | “”         |
| YFC18  | CSW10 <i>esc8Δ::kanMX</i>                                                                                                                                      | “”         |
| YFC21  | CSW42 <i>esc8Δ::kanMX</i>                                                                                                                                      | “”         |
| YFC24  | THC74 <i>sir2-AKAA::HIS3</i>                                                                                                                                   | “”         |
| YFC35  | L40 <i>sir2Δ::kanMX</i>                                                                                                                                        | “”         |
| YFC43  | CSW84 <i>esc8Δ::kanMX</i>                                                                                                                                      | “”         |
| YFC44  | GCY317 <i>sir2-AKAA::HIS3</i>                                                                                                                                  | “”         |
| YFC45  | CSW42 <i>ioc3Δ::kanMX</i>                                                                                                                                      | “”         |
| YFC95  | CSW116 <i>esc8Δ::kanMX</i>                                                                                                                                     | “”         |
| YFC96  | PMY127 <i>esc8Δ::kanMX</i>                                                                                                                                     | “”         |
| YFC97  | YFC8 <i>hst1Δ::kanMX</i>                                                                                                                                       | “”         |
| YFC101 | CSW116 <i>MATa SUM1-1 sir2Δ::hphMX</i>                                                                                                                         | “”         |
| YFC103 | YFC101 <i>hst1Δ::kanMX</i>                                                                                                                                     | “”         |
| YFC108 | PMY127 <i>mcm21Δ::kanMX</i>                                                                                                                                    | “”         |
| YFC109 | W303-1A <i>RS::HMRE-a2a1-HMRI-TRP1-256xlac<sup>op</sup>::RS (LEU2::GAL1p-R)<sub>2</sub>::leu2-3,112 ADE2::HIS3p-lacGFP::ade2-1 SUM1-1 scc1-73 sir2Δ::hphMX</i> | “”         |
| YFC116 | GCY317 <i>sir2Δ::hphMX</i>                                                                                                                                     | “”         |
| YFC117 | GCY310 <i>sir2Δ::hphMX</i>                                                                                                                                     | “”         |

|        |                               |    |
|--------|-------------------------------|----|
| YFC128 | YFC45 <i>esc8Δ::hphMX</i>     | “” |
| YFC143 | CSW42 <i>rfm1Δ::kanMX</i>     | “” |
| YFC135 | CSW42 <i>isw1Δ::kanMX</i>     | “” |
| YFC145 | CSW42 <i>ioc4Δ::kanMX</i>     | “” |
| YFC130 | CSW10 <i>ioc3Δ::kanMX</i>     | “” |
| YFC133 | CSW10 <i>isw1Δ::kanMX</i>     | “” |
| YFC144 | CSW10 <i>ioc4Δ::kanMX</i>     | “” |
| YFC137 | CSW10 <i>sir2-AKAK::HIS3</i>  | “” |
| YFC138 | CSW10 <i>sir2-AKDK::HIS3</i>  | “” |
| YFC139 | CSW10 <i>sir2-EKAK::HIS3</i>  | “” |
| YFC140 | GCY317 <i>sir2-AKAK::HIS3</i> | “” |
| YFC141 | GCY317 <i>sir2-AKDK::HIS3</i> | “” |
| YFC142 | GCY317 <i>sir2-EKAK::HIS3</i> | “” |
| YFC150 | CSW10 <i>matΔ::natMX</i>      | “” |
| YFC151 | CSW84 <i>matΔ::natMX</i>      | “” |
| YFC152 | YFC1 <i>matΔ::natMX</i>       | “” |
| YFC153 | YFC18 <i>matΔ::natMX</i>      | “” |
| YFC154 | CSW10 <i>MCD1-TAP::natMX</i>  | “” |
| YFC155 | CSW84 <i>MCD1-TAP::natMX</i>  | “” |
| YFC156 | YFC1 <i>MCD1-TAP::natMX</i>   | “” |
| YFC157 | YFC18 <i>MCD1-TAP::natMX</i>  | “” |

---

All strains were derived from W303-1A except L40 and YFC35.

## References for Tables

1. **James P, Halladay J, Craig EA.** 1996. Genomic libraries and a host strain designed for highly efficient two-hybrid selection in yeast. *Genetics* **144**:1425-1436.
2. **Wu CS, Chen YF, Gartenberg MR.** 2011. Targeted sister chromatid cohesion by Sir2. *PLoS Genet* **7**:e1002000.
3. **Thomas BJ, Rothstein R.** 1989. Elevated recombination rates in transcriptionally active DNA. *Cell* **56**:619-630.
4. **Chien C-T, Buck S, Sternglanz R, Shore D.** 1993. Targeting of Sir1 protein establishes transcriptional silencing at *HM* loci and telomeres in yeast. *Cell* **75**:531-541.
5. **Hollenberg SM, Sternglanz R, Cheng PF, Weintraub H.** 1995. Identification of a new family of tissue specific basic helix-loop-helix proteins with a two-hybrid system. *MCB* **15**:3813-3822.
6. **Chi M-H, Shore D.** 1996. *SUM1-1*, a dominant suppressor of *SIR* mutations in *Saccharomyces cerevisiae*, increases transcriptional silencing at telomeres and *HM* mating-type loci and decreases chromosome stability. *MCB* **16**:4281-4294.
7. **Megee PC, Koshland D.** 1999. A functional assay for centromere-associated sister chromatid cohesion. *Science* **285**:254-257.
8. **Tanny JC, Moazed D.** 2001. Coupling of histone deacetylation to NAD breakdown by the yeast silencing protein Sir2: Evidence for acetyl transfer from substrate to an NAD breakdown product. *PNAS* **98**:415-420.
9. **Cuperus G, Shore D.** 2002. Restoration of silencing in *Saccharomyces cerevisiae* by tethering of a novel Sir2-interacting protein, Esc8. *Genetics* **162**:633-645.
10. **Taddei A, Hediger F, Neumann FR, Bauer C, Gasser SM.** 2004. Separation of silencing from perinuclear anchoring functions in yeast Ku80, Sir4 and Esc1 proteins. *EMBO* **23**:1301-1312.
11. **Cheng T-H, Gartenberg MR.** 2000. Yeast heterochromatin is a dynamic structure that requires silencers continuously. *Genes & Dev* **14**:452-463.
12. **Chang CR, Wu CS, Hom Y, Gartenberg MR.** 2005. Targeting of cohesin by transcriptionally silent chromatin. *Genes & Dev* **19**:3031-3042.
13. **Chou CC, Li YC, Gartenberg MR.** 2008. Bypassing Sir2 and *O*-acetyl-ADP-ribose in transcriptional silencing. *Mol Cell* **31**:650-659.

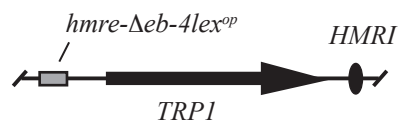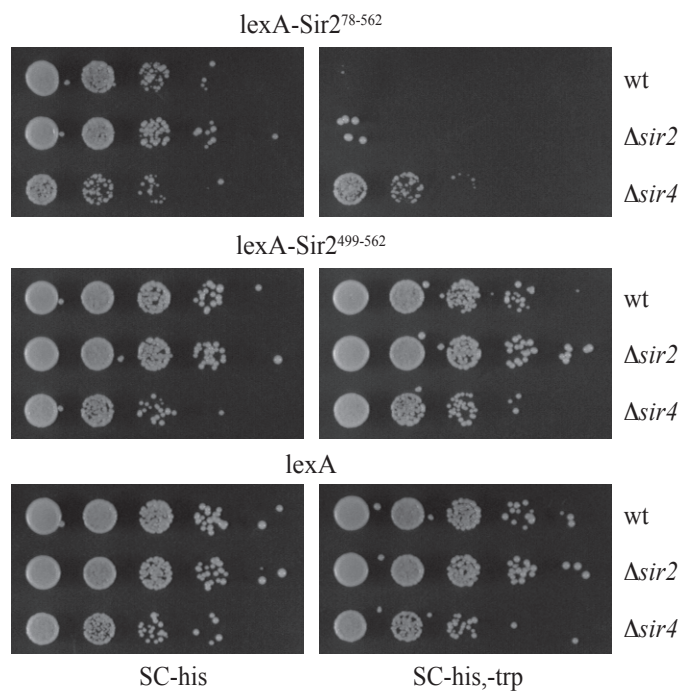



**Figure S1** – The cohesion proficient domain of Sir2 (amino acids 499-562) is not sufficient for targeted silencing. Strains GA-2050 (wt), CSW98 (*sir2Δ*) and CSW157 (*sir4Δ*) expressing *lexA-Sir2*<sup>499-562</sup> (pYFC1), *lexA-Sir2*<sup>78-562</sup> (pCSW22) or *lexA* alone (pBTM116H) were spotted on SC-trp,-his plates to measure silencing and on SC-his as a loading control. *lexA-Sir2*<sup>499-562</sup> does not nucleate silent chromatin but *lexA-Sir2*<sup>78-562</sup> does. Similar results were obtained for *lexA-Sir2*<sup>78-562</sup> when the chimera was tethered to a locus that lacks the *HMR I* silencer (Chia-Ching Chou, PhD Thesis, 2008).

**A.**

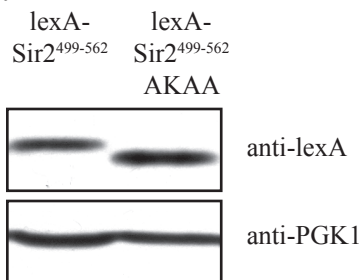

**B.**

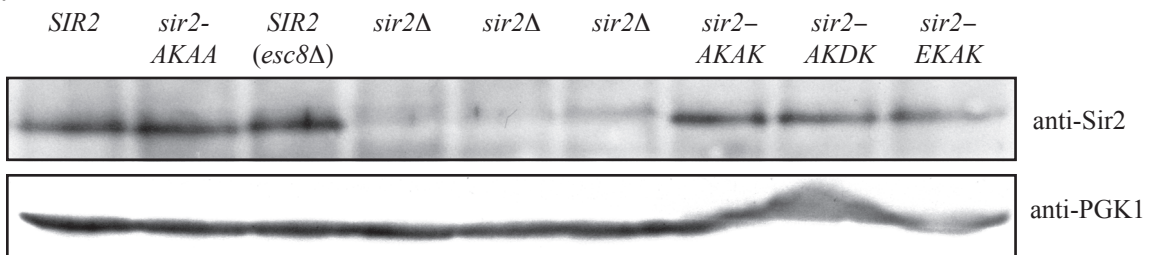

**Figure S2** – Sir2 protein levels in the strains used in this study. A) Levels of lexA-Sir2 chimeras. Immunoblotting was performed with strain CSW42 (*sir2Δ*) expressing either lexA-Sir2<sup>499-562</sup> (pYFC1) or lexA-Sir2<sup>499-562</sup>-AKAA (pYFC10). B) Levels of full length Sir2. Strains CSW10 (wt), CSW84 (*sir2Δ*), YFC1 (*sir2-AKAA*), YFC18 (*esc8Δ*), YFC137 (*sir2-AKAK*), YFC138 (*sir2-AKDK*), and YFC139 (*sir2-EKAK*) were used. Sir2 levels were not affected by mutation of the EKDK motif or deletion of *ESC8*.

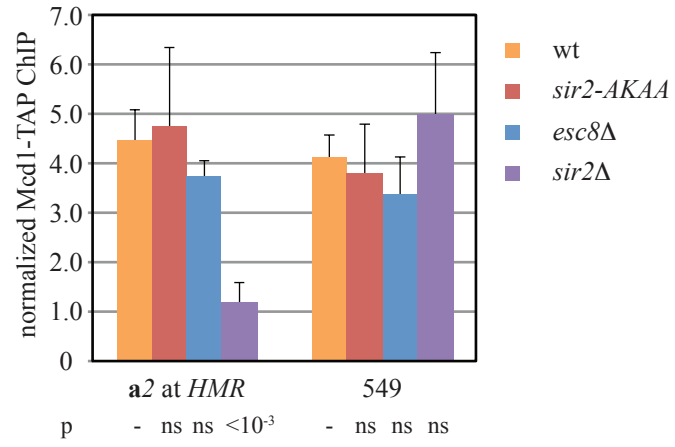

**Figure S3** – Cohesin binding at *HMR* in DNA circles. ChIP of Mcd1-TAP was performed with strains YFC154 (wt), YFC155 (*sir2Δ*), YFC156 (*sir2-AKAA*) and YFC157 (*esc8Δ*) two hours after the addition of galactose to form DNA circles. p values for student's t-test are reported relative to the wild-type strain.

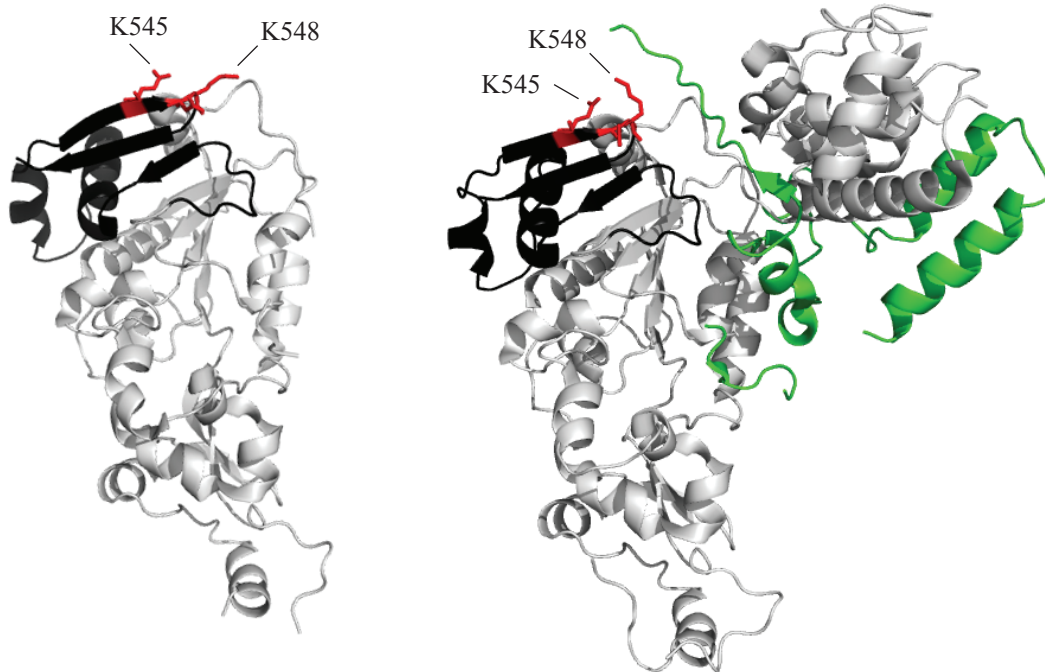

**Figure S4** – Positions of the EKDK motif within crystal structures of Sir2 alone and Sir2 with Sir4. Mutated residues are shown in red; the cohesion proficient domain of Sir2 is shown in black and the remainder of crystalized Sir2 is shown in grey. The Sir4 fragment is shown in green. Structures are based on coordinates from PDB accession numbers 2HJH and 4AIO).

**A.**

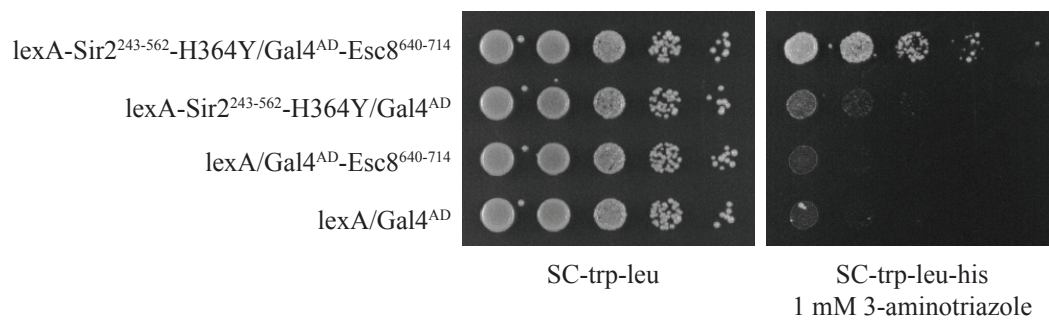

**B.**

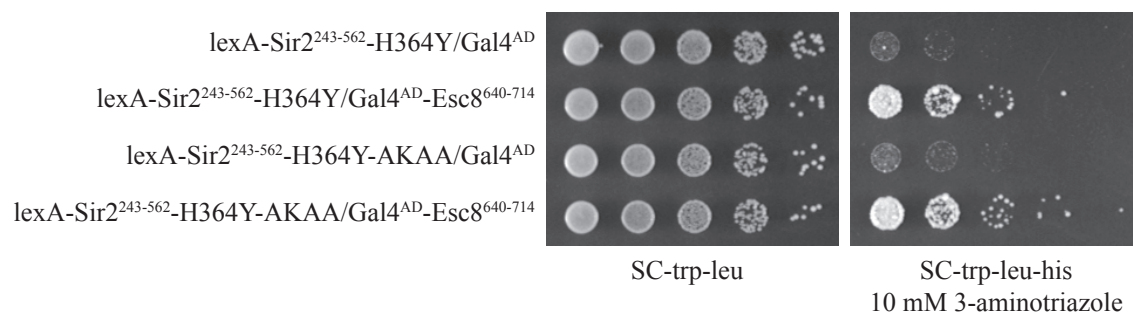



**Figure S5** – Two-hybrid interaction between Esc8 and Sir2. Candidate interacting factors were isolated according to protocol in Materials and Methods. **A)** Strain YFC35 (*sir2Δ*) expressing pairwise combinations of *lexA*-Sir2<sup>243-562</sup>-H364Y (pCSW55), GAL<sub>AD</sub>-Esc8<sup>640-714</sup> (pT2-4-14), *lexA* alone (pBTM116) and GAL<sub>AD</sub> alone (pGAD-C1) were spotted on SC-trp-leu as a loading control and SC-trp-leu-his plus 1 mM 3-AT to score interactions.

**B)** Strain YFC35 (*sir2Δ*) expressing pairwise combinations of *lexA*-Sir2<sup>243-562</sup>-H364Y (pCSW55), *lexA*-Sir2<sup>243-562</sup>-H364Y-AKAA (pYFC21), GAL<sub>AD</sub>-Esc8<sup>640-714</sup> (pT2-4-14) and GAL<sub>AD</sub> alone (pGAD-C1) were spotted on SC-trp-leu as a loading control and SC-trp-leu-his plus 10 mM 3-AT to score interactions. The AKAA mutation does not disrupt the association of Esc8 with Sir2.

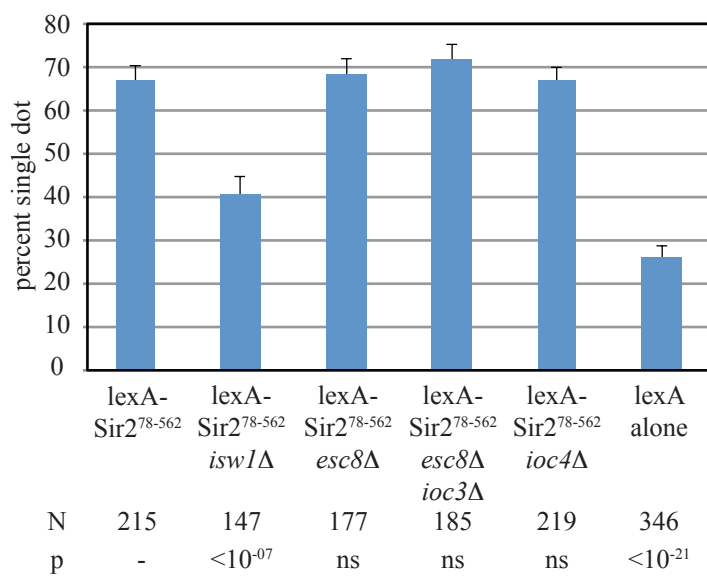

**Figure S6** – Cohesion of silent chromatin nucleated by *lexA-Sir2<sup>78-562</sup>* requires *Isw1* but not *Esc8* or the *Ioc* proteins. Cohesion of DNA circles bearing *lexA* sites was evaluated in strains CSW42 (*sir2Δ*), YFC135 (*sir2Δ isw1Δ*), YFC21 (*sir2Δ esc8Δ*), YFC128 (*sir2Δ ioc3Δ esc8Δ*) and YFC145 (*sir2Δ ioc4Δ*) expressing *lexA-Sir2<sup>78-562</sup>* (pCSW22). Strain CSW42 expressing *lexA* alone (pBTM116H) was included as a negative control. Cohesion mediated by tethered *Sir2* does not require *ESC8*, *IOC3* or *IOC4* even though *lexA-Sir2<sup>78-562</sup>* nucleates silent chromatin when targeted to DNA (See figure S1).
